# Supplementary material for: Identification of a p53-based portable degron based on the MDM2-p53 binding region
Source: Royal Society of Chemistry journal article supplement (doi:10.1039/c5an01429h), 2015-10-05
Supplement: c5an01429h1.pdf [file c5an01429h1.pdf]

## Supplemental Data

### Identification of a p53-based portable degron based on the MDM2-p53 binding region

Adam T. Melvin<sup>1</sup>, Lukas D. Dumberger<sup>2</sup>, Gregory S. Woss<sup>2</sup>, Marcey L. Waters<sup>2</sup>, and Nancy L. Allbritton<sup>2,3</sup>

<sup>1</sup>Cain Department of Chemical Engineering, Louisiana State University, Baton Rouge, LA, 70803

<sup>2</sup>Department of Chemistry, University of North Carolina, Chapel Hill, NC 27599

<sup>3</sup>Department of Biomedical Engineering, University of North Carolina, Chapel Hill, NC 27599 and North Carolina State University, Raleigh, NC 27695

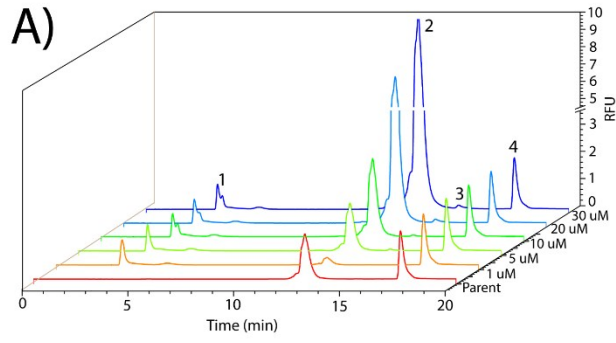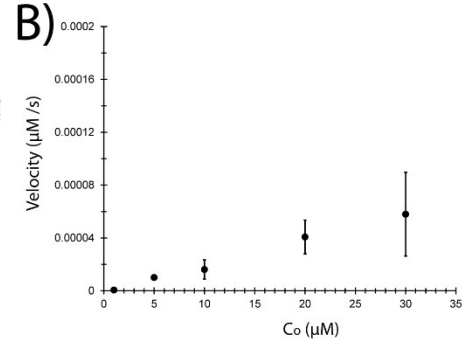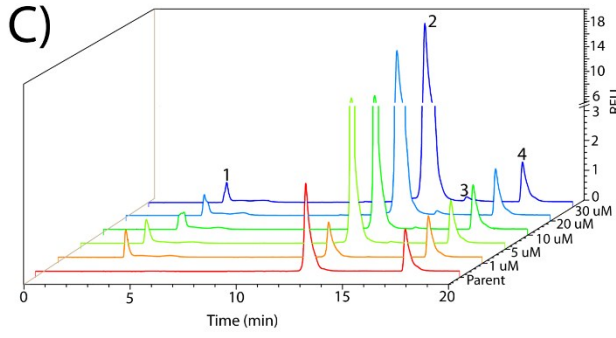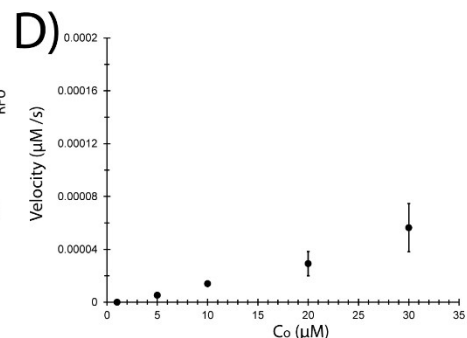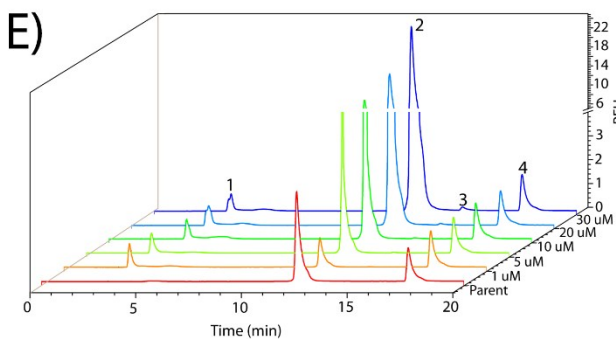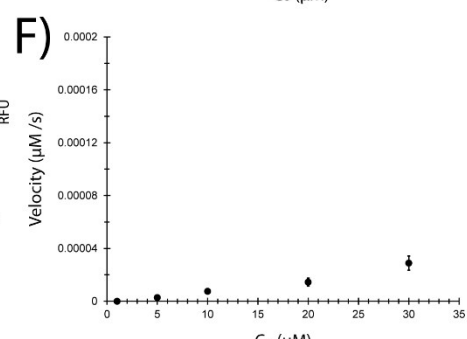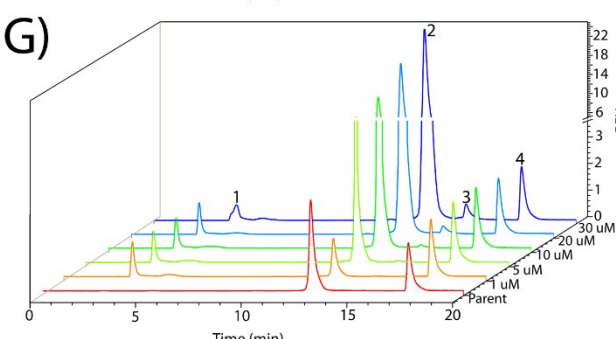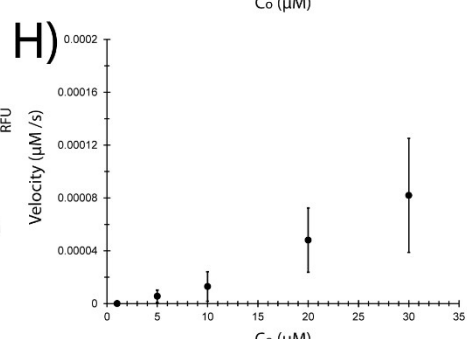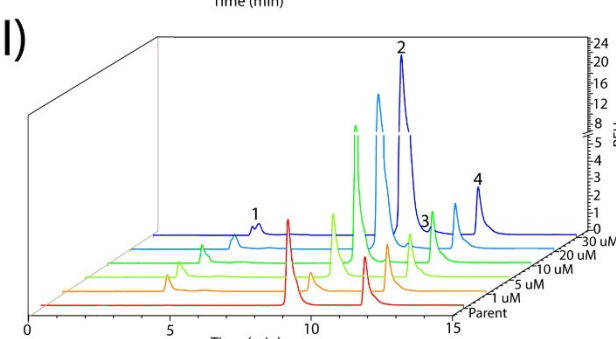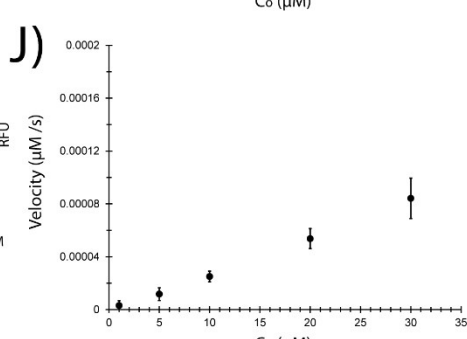

**Figure S1. Quantification of ubiquitination of the remaining members of the p53-based substrate library.** Chromatograms depicting the separation of parent peptide from Ub~peptide for peptides **3** (A), **4** (C), **5** (E), **6** (G), **8** (I) using initial peptide concentrations of 1  $\mu\text{M}$  (orange), 5  $\mu\text{M}$  (yellow), 10  $\mu\text{M}$  (green), 20  $\mu\text{M}$  (blue), and 30  $\mu\text{M}$  (indigo) as marked on the right side of each trace. Separation of parent peptide from the internal standard (FAM, carboxyfluorescein) was also performed (red) and is labeled "Parent". Peaks are labeled as parent peptide (peak 2), Ub~peptide (peak 3), internal standard (FAM, peak 4), and the unidentified, non-reactive contaminant (peak 1). The initial concentration of peptides **3** (B), **4** (D), **5** (F), **6** (H), and **8** (J) against the velocity of peptide ubiquitination ( $\mu\text{M}/\text{s}$ ). The data presented here is the average of three independent experiments with the standard deviation of the data points depicted by the error bars.
